# Supplementary material
Source: PubMed Central journal article supplement (PMC7197790)
Supplement: NIHMS1069118-supplement-Supplemental_Information.pdf [file NIHMS1069118-supplement-Supplemental_Information.pdf]

# **Beyond the Great Recession: Labor Market Polarization and Ongoing Fertility Decline in the United States**

Nathan Seltzer, University of Wisconsin-Madison

## **Online Appendix**

**Online Appendix Figure S1.** Histogram of all TFR values generated by Eq. 1 between 2006-2014

**Online Appendix Figure S2.** Total Fertility Rate by Race/Ethnicity For all U.S. Metro Areas between 1990-2014

**Online Appendix Figure S3.** The Decline of Goods-Producing Businesses in the United States, 2006-2014, disaggregated by MSA

**Online Appendix Table S1.** Full Regression Output of Table 3, Full 381 MSA analysis

**Online Appendix Table S2.** Fixed-Effects Regression Models of Total Fertility Rate by Race/Ethnicity between 2006-2014 for ACS Subsample, Substituting Divorce Rate for Adults Ages 15-64 for Percent Single, Never-Married

**Online Appendix Table S3.** Fixed-Effects Regression Models of Total Fertility Rate for Hispanics between 2006-2014 for ACS Subsample, adjusting for the Percentage of Reproductive Age Hispanic Women who are Mexican Immigrants

**Online Appendix Table S4a.** Robustness and Sensitivity Checks

**Online Appendix Table S4b.** Unemployment Rate and Labor Force Participation Rate Sensitivity Checks

**Online Appendix Table S5.** Descriptive Statistics, Extended Analysis

**Online Appendix Table S6.** Fixed-Effects Regression Models of Age-Specific Fertility Rates by Race/Ethnicity between 2006-2014 for All MSAs

**Online Appendix Text S1.** Limitations of Employee Data in the County Business Patterns Dataset

**Online Appendix Figure S1.** Histogram of all TFR values generated by Eq. 1 between 2006-2014 (N=13,709)

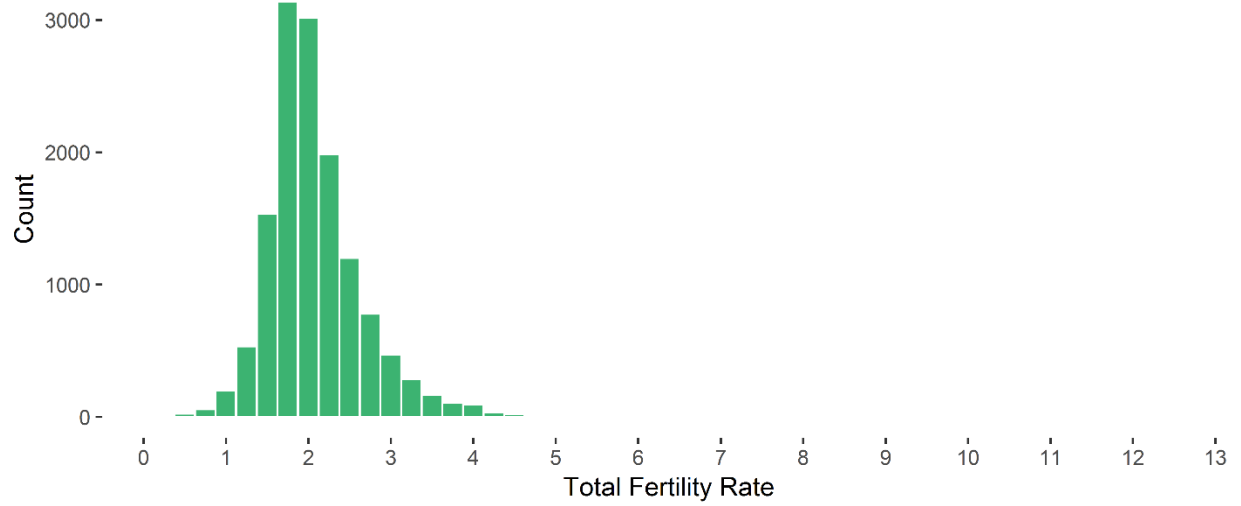

Note: 159 outliers above TFR of four, 38 outliers above TFR of five, and 2 outliers above TFR of eight.

**Online Appendix Figure S2.** Total Fertility Rate by Race/Ethnicity For all U.S. Metro Areas between 1990-2014

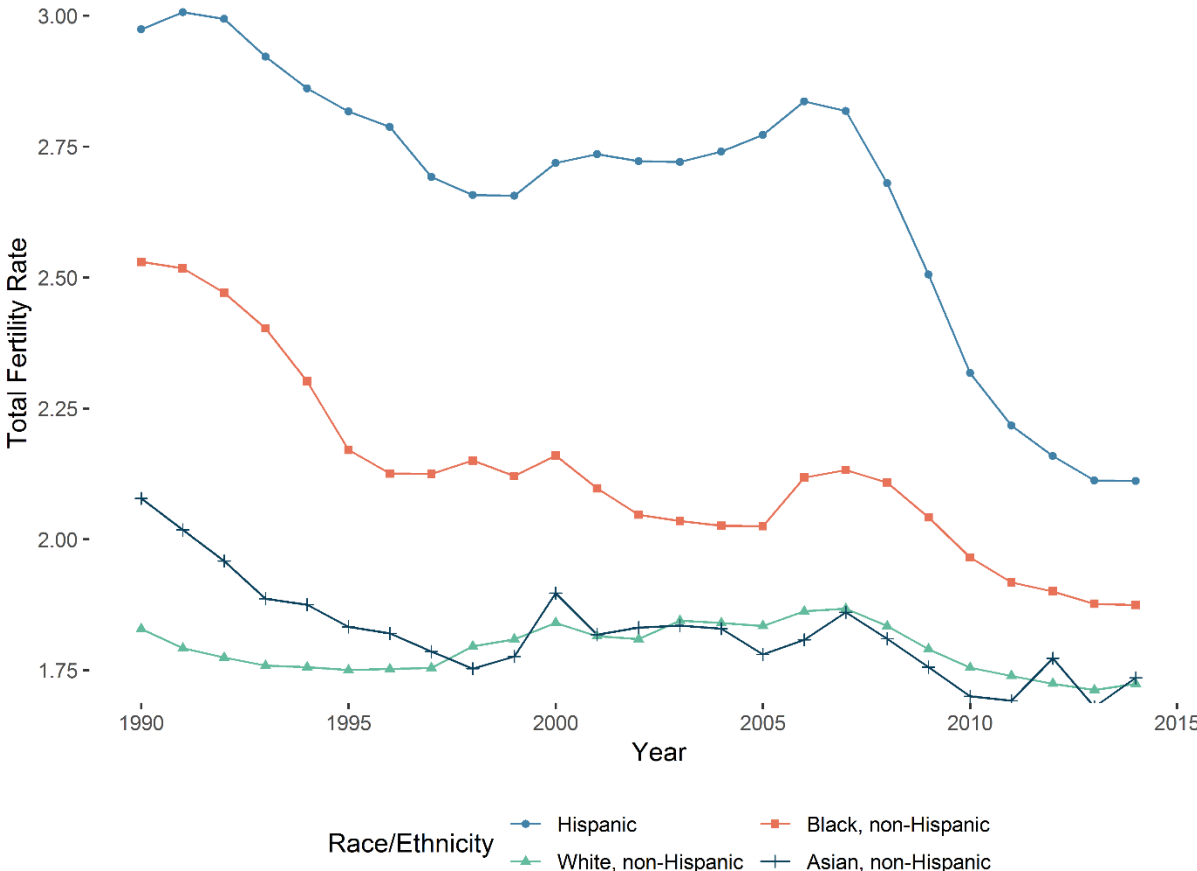

**Online Appendix Figure S3.** The Decline of Goods-Producing Businesses in the United States, 2006-2014, disaggregated by MSA

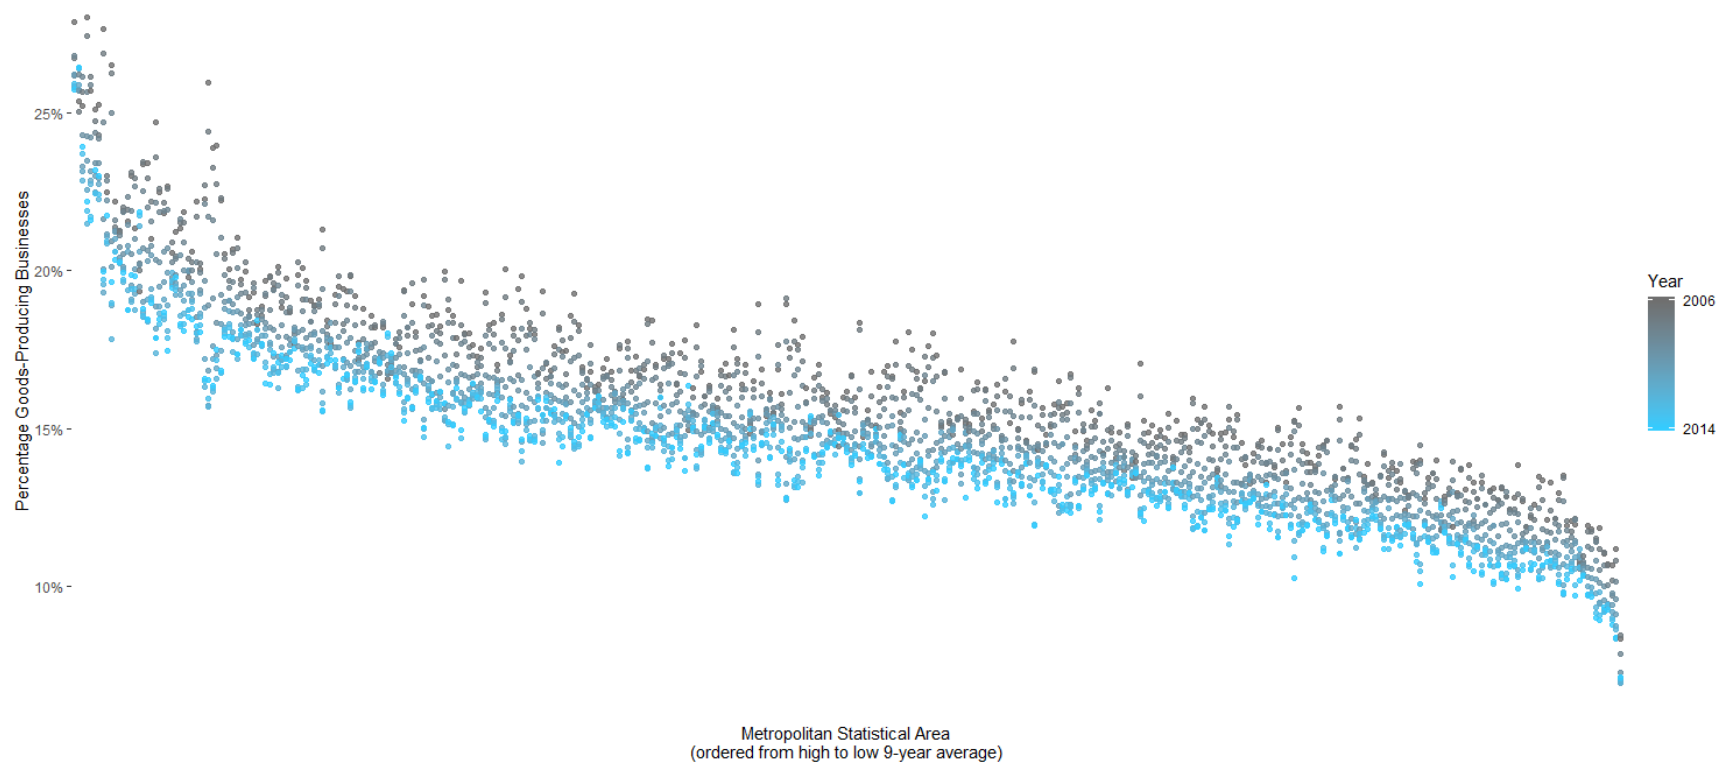

Notes: (a) Each vertical set of points represents one MSA over 9 years. (b) MSAs are ordered from high to low based on 9-year average of the share of goods-producing businesses. (c) Data are from the U.S. Census County Business Patterns Program, 2006-2014.

**Online Appendix Table S1. Full Regression Output of Table 3, Full 381 MSA analysis**

|                        | <u>Non-Hispanic White</u> |                      |                      | <u>Non-Hispanic Black</u> |                     |                    | <u>Non-Hispanic Asian</u> |                      |                      | <u>Hispanic</u>      |                      |                      |
|------------------------|---------------------------|----------------------|----------------------|---------------------------|---------------------|--------------------|---------------------------|----------------------|----------------------|----------------------|----------------------|----------------------|
|                        | Model 1                   | Model 2              | Model 3              | Model 1                   | Model 2             | Model 3            | Model 1                   | Model 2              | Model 3              | Model 1              | Model 2              | Model 3              |
| pct_goodsproducing_lag |                           | 0.021***<br>(0.002)  | 0.020***<br>(0.002)  |                           | 0.022**<br>(0.008)  | 0.019*<br>(0.008)  |                           | 0.027**<br>(0.010)   | 0.022*<br>(0.011)    |                      | 0.058***<br>(0.008)  | 0.046***<br>(0.008)  |
| UnemploymentMSA_lag    | -0.007***<br>(0.001)      |                      | -0.003*<br>(0.001)   | -0.012*<br>(0.005)        |                     | -0.008<br>(0.006)  | -0.016*<br>(0.007)        |                      | -0.012<br>(0.007)    | -0.036***<br>(0.005) |                      | -0.027***<br>(0.006) |
| TOT_POP_log_lag        | -0.082<br>(0.056)         | 0.056<br>(0.057)     | 0.050<br>(0.057)     | -0.367<br>(0.226)         | -0.228<br>(0.232)   | -0.245<br>(0.232)  | 0.282<br>(0.291)          | 0.451<br>(0.299)     | 0.424<br>(0.299)     | -2.248***<br>(0.238) | -1.915***<br>(0.242) | -1.988***<br>(0.241) |
| gdp_pc_lag             | 0.051***<br>(0.009)       | 0.024*<br>(0.010)    | 0.019*<br>(0.010)    | -0.007<br>(0.037)         | -0.025<br>(0.039)   | -0.037<br>(0.039)  | 0.375***<br>(0.048)       | 0.358***<br>(0.050)  | 0.340***<br>(0.051)  | 0.345***<br>(0.037)  | 0.313***<br>(0.038)  | 0.273***<br>(0.039)  |
| 2006.year              | 0.000<br>(.)              | 0.000<br>(.)         | 0.000<br>(.)         | 0.000<br>(.)              | 0.000<br>(.)        | 0.000<br>(.)       | 0.000<br>(.)              | 0.000<br>(.)         | 0.000<br>(.)         | 0.000<br>(.)         | 0.000<br>(.)         | 0.000<br>(.)         |
| 2007.year              | 0.004<br>(0.005)          | 0.011*<br>(0.005)    | 0.010*<br>(0.005)    | 0.050*<br>(0.021)         | 0.058**<br>(0.021)  | 0.056**<br>(0.021) | -0.033<br>(0.027)         | -0.024<br>(0.027)    | -0.026<br>(0.027)    | -0.047*<br>(0.022)   | -0.029<br>(0.022)    | -0.032<br>(0.022)    |
| 2008.year              | -0.041***<br>(0.006)      | -0.028***<br>(0.006) | -0.028***<br>(0.006) | 0.043<br>(0.024)          | 0.056*<br>(0.024)   | 0.055*<br>(0.024)  | -0.152***<br>(0.030)      | -0.138***<br>(0.031) | -0.138***<br>(0.031) | -0.202***<br>(0.024) | -0.172***<br>(0.024) | -0.172***<br>(0.024) |
| 2009.year              | -0.090***<br>(0.007)      | -0.074***<br>(0.007) | -0.070***<br>(0.007) | -0.031<br>(0.028)         | -0.021<br>(0.029)   | -0.012<br>(0.030)  | -0.227***<br>(0.037)      | -0.220***<br>(0.037) | -0.206***<br>(0.038) | -0.350***<br>(0.028) | -0.337***<br>(0.029) | -0.306***<br>(0.029) |
| 2010.year              | -0.099***<br>(0.009)      | -0.093***<br>(0.007) | -0.082***<br>(0.009) | -0.054<br>(0.036)         | -0.071*<br>(0.029)  | -0.038<br>(0.037)  | -0.184***<br>(0.046)      | -0.214***<br>(0.037) | -0.166***<br>(0.047) | -0.342***<br>(0.036) | -0.409***<br>(0.029) | -0.302***<br>(0.037) |
| 2011.year              | -0.117***<br>(0.010)      | -0.104***<br>(0.008) | -0.091***<br>(0.010) | -0.080*<br>(0.040)        | -0.092**<br>(0.033) | -0.056<br>(0.041)  | -0.207***<br>(0.051)      | -0.232***<br>(0.043) | -0.179***<br>(0.053) | -0.417***<br>(0.040) | -0.475***<br>(0.033) | -0.357***<br>(0.041) |
| 2012.year              | -0.135***<br>(0.011)      | -0.106***<br>(0.010) | -0.095***<br>(0.011) | -0.073<br>(0.042)         | -0.067<br>(0.040)   | -0.035<br>(0.046)  | -0.270***<br>(0.055)      | -0.273***<br>(0.051) | -0.226***<br>(0.059) | -0.558***<br>(0.042) | -0.570***<br>(0.040) | -0.466***<br>(0.045) |
| 2013.year              | -0.166***<br>(0.011)      | -0.124***<br>(0.011) | -0.115***<br>(0.012) | -0.111*<br>(0.044)        | -0.089<br>(0.046)   | -0.063<br>(0.049)  | -0.396***<br>(0.056)      | -0.378***<br>(0.059) | -0.340***<br>(0.063) | -0.636***<br>(0.044) | -0.601***<br>(0.045) | -0.517***<br>(0.049) |
| 2014.year              | -0.156***<br>(0.011)      | -0.108***<br>(0.011) | -0.101***<br>(0.012) | -0.081<br>(0.043)         | -0.050<br>(0.047)   | -0.029<br>(0.049)  | -0.412***<br>(0.055)      | -0.383***<br>(0.060) | -0.352***<br>(0.063) | -0.648***<br>(0.043) | -0.588***<br>(0.047) | -0.521***<br>(0.049) |
| _cons                  | 2.840***<br>(0.711)       | 0.809<br>(0.725)     | 0.938<br>(0.727)     | 6.820*<br>(2.849)         | 4.691<br>(2.946)    | 5.054<br>(2.956)   | -2.707<br>(3.667)         | -5.320<br>(3.791)    | -4.770<br>(3.804)    | 30.211***<br>(2.996) | 24.966***<br>(3.061) | 26.346***<br>(3.063) |
| BIC                    | -8964.134                 | -9062.759            | -9059.313            | 515.738                   | 512.584             | 518.285            | 2193.286                  | 2191.786             | 2196.777             | 366.063              | 357.993              | 339.903              |
| Log-Likelihood         | 4530.907                  | 4580.220             | 4582.567             | -209.090                  | -207.513            | -206.299           | -1047.865                 | -1047.115            | -1045.545            | -134.362             | -130.327             | -117.226             |
| # MSAs                 | 3429                      | 3429                 | 3429                 | 3394                      | 3394                | 3394               | 3394                      | 3394                 | 3394                 | 3333                 | 3333                 | 3333                 |
| # Observations         | 381                       | 381                  | 381                  | 380                       | 380                 | 380                | 381                       | 381                  | 381                  | 381                  | 381                  | 381                  |

\* p<.05, \*\* p<.01, \*\*\* p<.001 (two-tailed tests)

**Online Appendix Table S2.** Fixed-Effects Regression Models of Total Fertility Rate by Race/Ethnicity between 2006-2014 for ACS Subsample, Substituting Divorce Rate for Adults Ages 15-64 for Percent Single, Never-Married

|                                               | 2006-2014            |
|-----------------------------------------------|----------------------|
| Dependent Variable: Total Fertility Rate      | Model 1              |
| <i>White, Non-Hispanic</i> (290 MSAs; N=2375) |                      |
| % Goods-Producing Businesses                  | 0.021***<br>(0.002)  |
| Unemployment Rate (%)                         | -0.001<br>(0.001)    |
| <i>Black, Non-Hispanic</i> (289 MSAs; N=2354) |                      |
| % Goods-Producing Businesses                  | 0.014<br>(0.009)     |
| Unemployment Rate (%)                         | -0.007<br>(0.005)    |
| <i>Asian, Non-Hispanic</i> (290 MSAs; N=2360) |                      |
| % Goods-Producing Businesses                  | 0.007<br>(0.012)     |
| Unemployment Rate (%)                         | -0.014<br>(0.007)    |
| <i>Hispanic</i> (290 MSAs; N=2319)            |                      |
| % Goods-Producing Businesses                  | 0.063***<br>(0.009)  |
| Unemployment Rate (%)                         | -0.031***<br>(0.006) |
| MSA Controls                                  | Yes                  |
| Year Fixed Effects                            | Yes                  |

\* p<.05, \*\* p<.01, \*\*\* p<.001 (two-tailed tests)

Notes: (a) Year fixed effects and MSA-level covariates included in all models. Covariates include annual measures of logged population, per capita GDP, percentage of homeowners, percentage of one-year in-migration, percentage with more than a high school education, and percentage divorced. (b) All covariates are lagged one year. (c) Standard errors in parentheses

**Online Appendix Table S3.** Fixed-Effects Regression Models of Total Fertility Rate for Hispanics between 2006-2014 for ACS Subsample, adjusting for the Percentage of Reproductive Age Hispanic Women who are Mexican Immigrants

| Dependent Variable: Total Fertility Rate | 2006-2014            |                     |                      | 2006-2010            | 2011-2014            |
|------------------------------------------|----------------------|---------------------|----------------------|----------------------|----------------------|
|                                          | Model 1              | Model 2             | Model 3              | Model 4a             | Model 4b             |
| <i>Hispanic</i> (282 MSAs; N = 2023)     |                      |                     |                      |                      |                      |
| % Goods-Producing Businesses             |                      | 0.097***<br>(0.007) | 0.082***<br>(0.008)  | 0.059***<br>(0.008)  | 0.052***<br>(0.009)  |
| Unemployment Rate (%)                    | -0.046***<br>(0.005) |                     | -0.027***<br>(0.005) | -0.033***<br>(0.006) | -0.023***<br>(0.005) |
| MSA Controls                             | Yes                  | Yes                 | Yes                  | Yes                  | Yes                  |
| Year Fixed Effects                       | Yes                  | Yes                 | Yes                  | Yes                  | Yes                  |

\* p<.05, \*\* p<.01, \*\*\* p<.001 (two-tailed tests)

Notes: (a) Year fixed effects and MSA-level covariates included in all models. Covariates include annual measures of logged population, per capita GDP, percentage of homeowners, percentage with more than a high school education, and percentage never married, and percentage of reproductive-age Hispanic women who are Mexican immigrants. (b) All covariates are lagged one year. (c) Standard errors in parentheses

**Online Appendix Table S4a. Robustness and Sensitivity Checks**

| Independent Variable       | Log Number of Goods-Producing Business Establishments |                      |                      | % Goods-Producing Business Establishments | % Goods-Producing Employees (Mid-March) |
|----------------------------|-------------------------------------------------------|----------------------|----------------------|-------------------------------------------|-----------------------------------------|
|                            | Full                                                  | ACS Subset           | ACS Subset           | ACS Subset                                | Full                                    |
| Covariate Set              | MSA                                                   | MSA                  | Racial/Ethnic        | Racial/Ethnic                             | MSA                                     |
| Dependent Variable: TFR    | Model 1                                               | Model 2              | Model 3              | Model 4                                   | Model 5                                 |
| <i>White, Non-Hispanic</i> |                                                       |                      |                      |                                           |                                         |
| Goods-Producing Variable   | 0.138***<br>(0.022)                                   | 0.259***<br>(0.032)  | 0.252***<br>(0.032)  | 0.022***<br>(0.002)                       | 0.004***<br>(0.001)                     |
| Unemployment Rate (%)      | -0.011***<br>(0.001)                                  | -0.001<br>(0.002)    | -0.001<br>(0.002)    | -0.001<br>(0.001)                         | -0.005***<br>(0.001)                    |
| <i>Black, Non-Hispanic</i> |                                                       |                      |                      |                                           |                                         |
| Goods-Producing Variable   | 0.306***<br>(0.074)                                   | 0.083<br>(0.116)     | 0.112<br>(0.090)     | 0.013<br>(0.007)                          | 0.007*<br>(0.003)                       |
| Unemployment Rate (%)      | -0.020***<br>(0.004)                                  | -0.008<br>(0.005)    | -0.005<br>(0.004)    | -0.005<br>(0.004)                         | -0.009<br>(0.006)                       |
| <i>Asian, Non-Hispanic</i> |                                                       |                      |                      |                                           |                                         |
| Goods-Producing Variable   | 0.088<br>(0.094)                                      | 0.168<br>(0.158)     | 0.159<br>(0.149)     | 0.016<br>(0.011)                          | 0.012**<br>(0.004)                      |
| Unemployment Rate (%)      | -0.021***<br>(0.006)                                  | -0.013<br>(0.007)    | -0.016*<br>(0.007)   | -0.015*<br>(0.007)                        | -0.012<br>(0.007)                       |
| <i>Hispanic</i>            |                                                       |                      |                      |                                           |                                         |
| Goods-Producing Variable   | 0.519***<br>(0.080)                                   | 0.915***<br>(0.122)  | 0.958***<br>(0.113)  | 0.066***<br>(0.008)                       | 0.007*<br>(0.003)                       |
| Unemployment Rate (%)      | -0.028***<br>(0.005)                                  | -0.028***<br>(0.006) | -0.020***<br>(0.005) | -0.024***<br>(0.005)                      | -0.033***<br>(0.005)                    |

\* p<.05, \*\* p<.01, \*\*\* p<.001 (two-tailed tests)



**Online Appendix Table S4b.** Unemployment Rate and Labor Force Participation Rate Sensitivity Checks

| Independent Variable                          | % Goods-Producing   |                     |                     |                     |                     |
|-----------------------------------------------|---------------------|---------------------|---------------------|---------------------|---------------------|
| Sample                                        | ACS Subset          |                     |                     |                     |                     |
| Covariate Set                                 | MSA                 |                     |                     |                     |                     |
| Dependent Variable: TFR                       | Model 6             | Model 7             | Model 8             | Model 9             | Model 10            |
| <i>White, Non-Hispanic (290 MSAs; N=2375)</i> |                     |                     |                     |                     |                     |
| % Goods-Producing                             | 0.021***<br>(0.002) | 0.022***<br>(0.002) | 0.022***<br>(0.002) | 0.021***<br>(0.002) | 0.021***<br>(0.002) |
| Female Unemployment Rate                      | -0.001<br>(0.001)   |                     |                     |                     |                     |
| Male Unemployment Rate                        | -0.001<br>(0.001)   |                     |                     |                     |                     |
| Labor Force Participation Rate                |                     | 0.001<br>(0.001)    |                     |                     |                     |
| Female Labor Force Participation Rate         |                     |                     | 0.001<br>(0.001)    |                     |                     |
| Male Labor Force Participation Rate           |                     |                     | 0.000<br>(0.001)    |                     |                     |
| Employment-to-Population Ratio                |                     |                     |                     | 0.002**<br>(0.001)  |                     |
| Female Employment-to-Population Ratio         |                     |                     |                     |                     | 0.001*<br>(0.001)   |
| Male Employment-to-Population Ratio           |                     |                     |                     |                     | 0.001<br>(0.001)    |
| <i>Black, Non-Hispanic (289 MSAs; N=2354)</i> |                     |                     |                     |                     |                     |
| % Goods-Producing                             | 0.015<br>(0.009)    | 0.016<br>(0.008)    | 0.017*<br>(0.008)   | 0.015<br>(0.008)    | 0.016<br>(0.008)    |
| Female Unemployment Rate                      | -0.003<br>(0.003)   |                     |                     |                     |                     |
| Male Unemployment Rate                        | -0.001<br>(0.003)   |                     |                     |                     |                     |
| Labor Force Participation Rate                |                     | 0.001<br>(0.003)    |                     |                     |                     |
| Female Labor Force Participation Rate         |                     |                     | -0.003<br>(0.002)   |                     |                     |
| Male Labor Force Participation Rate           |                     |                     | 0.003<br>(0.002)    |                     |                     |
| Employment-to-Population Ratio                |                     |                     |                     | 0.002<br>(0.003)    |                     |
| Female Employment-to-Population Ratio         |                     |                     |                     |                     | -0.001<br>(0.002)   |
| Male Employment-to-Population Ratio           |                     |                     |                     |                     | 0.004               |

|                                               |                     |                     |                     |                     | (0.002)             |
|-----------------------------------------------|---------------------|---------------------|---------------------|---------------------|---------------------|
| <i>Asian, Non-Hispanic (290 MSAs; N=2369)</i> |                     |                     |                     |                     |                     |
| % Goods-Producing                             | 0.011<br>(0.012)    | 0.013<br>(0.011)    | 0.014<br>(0.011)    | 0.013<br>(0.012)    | 0.013<br>(0.012)    |
| Female Unemployment Rate                      | 0.006<br>(0.004)    |                     |                     |                     |                     |
| Male Unemployment Rate                        | -0.007<br>(0.004)   |                     |                     |                     |                     |
| Labor Force Participation Rate                |                     | -0.001<br>(0.004)   |                     |                     |                     |
| Female Labor Force Participation Rate         |                     |                     | -0.004<br>(0.003)   |                     |                     |
| Male Labor Force Participation Rate           |                     |                     | 0.003<br>(0.003)    |                     |                     |
| Employment-to-Population Ratio                |                     |                     |                     | 0.000<br>(0.004)    |                     |
| Female Employment-to-Population Ratio         |                     |                     |                     |                     | 0.000<br>(0.003)    |
| Male Employment-to-Population Ratio           |                     |                     |                     |                     | 0.000<br>(0.003)    |
| <i>Hispanic (290 MSAs; N=2319)</i>            |                     |                     |                     |                     |                     |
| % Goods-Producing                             | 0.071***<br>(0.009) | 0.076***<br>(0.009) | 0.076***<br>(0.009) | 0.073***<br>(0.009) | 0.072***<br>(0.009) |
| Female Unemployment Rate                      | -0.002<br>(0.003)   |                     |                     |                     |                     |
| Male Unemployment Rate                        | -0.006*<br>(0.003)  |                     |                     |                     |                     |
| Labor Force Participation Rate                |                     | 0.002<br>(0.003)    |                     |                     |                     |
| Female Labor Force Participation Rate         |                     |                     | 0.003<br>(0.002)    |                     |                     |
| Male Labor Force Participation Rate           |                     |                     | -0.001<br>(0.002)   |                     |                     |
| Employment-to-Population Ratio                |                     |                     |                     | 0.006*<br>(0.003)   |                     |
| Female Employment-to-Population Ratio         |                     |                     |                     |                     | 0.005*<br>(0.002)   |
| Male Employment-to-Population Ratio           |                     |                     |                     |                     | -0.000<br>(0.002)   |

\* p<.05, \*\* p<.01, \*\*\* p<.001 (two-tailed tests)

Notes: unemployment rates, labor force participation rates, and employment-to-population ratios are calculated at the MSA-level and for working age adults 15-64.

**Online Appendix Table S5.** Descriptive Statistics, Extended Analysis

| Variables                             | 1991-2014 |       |                |
|---------------------------------------|-----------|-------|----------------|
|                                       | Mean      | S.D.  | Number of MSAs |
| <i>Total Fertility Rate</i>           |           |       |                |
| White TFR                             | 1.86      | 0.27  | 381            |
| Black TFR                             | 2.07      | 0.52  | 381            |
| Asian TFR                             | 1.93      | 0.55  | 381            |
| Hispanic TFR                          | 2.44      | 0.68  | 381            |
| <i>MSA-level Covariates</i>           |           |       |                |
| Unemployment Rate (%)                 | 6.19      | 2.85  | 381            |
| Percentage Goods-Producing Businesses | 16.71     | 3.16  | 381            |
| Total Population (logged)             | 12.56     | 10.37 | 381            |

Notes: (1) All covariates lagged 1-year

**Online Appendix Table S6.** Fixed-Effects Regression Models of Age-Specific Fertility Rates by Race/Ethnicity between 2006-2014 for All MSAs

| Dependent Variable: Age-Specific Fertility Rates | 15-19                   | 20-24                    | 25-29                    | 30-34                   | 35-39                  | 40-44                  | 45-49                  |
|--------------------------------------------------|-------------------------|--------------------------|--------------------------|-------------------------|------------------------|------------------------|------------------------|
| <i>White, Non-Hispanic</i> (381 MSAs)            |                         |                          |                          |                         |                        |                        |                        |
| % Goods-Producing Businesses                     | 0.00028**<br>(0.00010)  | 0.00158***<br>(0.00020)  | 0.00067**<br>(0.00021)   | 0.00097***<br>(0.00017) | 0.00031**<br>(0.00010) | 0.00012**<br>(0.00004) | 0.00003*<br>(0.00001)  |
| Unemployment Rate (%)                            | -0.00022**<br>(0.00007) | -0.00089***<br>(0.00013) | 0.00017<br>(0.00014)     | 0.00021<br>(0.00011)    | 0.00012<br>(0.00007)   | 0.00006*<br>(0.00003)  | 0.00000<br>(0.00001)   |
| <i>Black, Non-Hispanic</i> (380 MSAs)            |                         |                          |                          |                         |                        |                        |                        |
| % Goods-Producing Businesses                     | 0.00039<br>(0.00040)    | 0.00006<br>(0.00074)     | 0.00239**<br>(0.00081)   | 0.00056<br>(0.00070)    | 0.00049<br>(0.00060)   | 0.00035<br>(0.00036)   | -0.00008<br>(0.00017)  |
| Unemployment Rate (%)                            | 0.00040<br>(0.00026)    | -0.00135**<br>(0.00049)  | -0.00038<br>(0.00054)    | -0.00023<br>(0.00046)   | 0.00032<br>(0.00038)   | 0.00014<br>(0.00022)   | 0.00012<br>(0.00009)   |
| <i>Asian, Non-Hispanic</i> (380 MSAs)            |                         |                          |                          |                         |                        |                        |                        |
| % Goods-Producing Businesses                     | 0.00043<br>(0.00062)    | 0.00275**<br>(0.00099)   | 0.00101<br>(0.00107)     | 0.00072<br>(0.00095)    | -0.00043<br>(0.00069)  | 0.00042<br>(0.00041)   | -0.00094<br>(0.00063)  |
| Unemployment Rate (%)                            | 0.00029<br>(0.00041)    | -0.00065<br>(0.00067)    | -0.00147*<br>(0.00072)   | 0.00041<br>(0.00064)    | 0.00000<br>(0.00047)   | 0.00008<br>(0.00027)   | -0.00074*<br>(0.00036) |
| <i>Hispanic</i> (381 MSAs)                       |                         |                          |                          |                         |                        |                        |                        |
| % Goods-Producing Businesses                     | 0.00227***<br>(0.00049) | 0.00470***<br>(0.00071)  | 0.00221**<br>(0.00069)   | 0.00051<br>(0.00062)    | 0.00051<br>(0.00046)   | 0.00019<br>(0.00049)   | -0.00040<br>(0.00039)  |
| Unemployment Rate (%)                            | 0.00004<br>(0.00032)    | -0.00201***<br>(0.00047) | -0.00180***<br>(0.00046) | -0.00108**<br>(0.00041) | -0.00026<br>(0.00030)  | 0.00009<br>(0.00032)   | -0.00005<br>(0.00022)  |
| MSA Controls                                     | Yes                     | Yes                      | Yes                      | Yes                     | Yes                    | Yes                    | Yes                    |
| Year Fixed Effects                               | Yes                     | Yes                      | Yes                      | Yes                     | Yes                    | Yes                    | Yes                    |

\* p<.05, \*\* p<.01, \*\*\* p<.001 (two-tailed tests)

## **Online Appendix Text S1.** Limitations of Employee Data in the County Business Patterns Dataset

The statistical analyses presented in this study operationalize labor market polarization as the percentage of goods-producing *business establishments* in a MSA. Although the County Business Patterns dataset includes a variable for the number of mid-March employees which could be used to calculate the percentage of *employees* in goods-producing industries, the use of this measure is not without several data and conceptual limitations. Nevertheless, the employee measure and the business establishment measure are strongly correlated ( $r = .5015$ ).

The main consideration for this decision is the availability and quality of the employee data for business establishments. A nontrivial amount of the employee data is withheld from the dataset since the Census Bureau is prohibited by law from releasing information that would identify the operations of individual employers (CBP Methodology Report). Missing values in the dataset are not missing based on county population size; instead, data is withheld based on the sparseness of the number of business establishments within each sub-classification level of the NAICS coding scheme.

In contrast, none of the data on the number of business establishments for each NAICS sub-classification level are withheld since this data is not considered confidential (CBP Methodology Report).

There are also conceptual reasons for using a business establishment measure over an employee measure. As noted in the Data and Methods section, I conceptualize labor market polarization as more than just the loss of middle-skill, middle-wage jobs in manufacturing and construction industries, but instead the decline of those industries themselves. Closure of business establishments in the goods-producing business sector (e.g. factory closures) are more permanent than layoffs of individual workers in the sense that it is more difficult for jobs to return once a business establishment has been permanently closed. As a result, I argue that structural change in U.S. labor markets is best measured through the loss of business establishments.

As a robustness check, I calculate and estimate models using the employee measure (Online Appendix Table S4a, Model 5), which should be interpreted with an understanding of the limitations noted above.

### References:

U.S. Census Bureau. 2018. County Business Patterns Methodology Report. Retrieved from <https://www.census.gov/programs-surveys/cbp/technical-documentation/methodology.html>.

U.S. Census Bureau. 2018. County Business Patterns, Using Noise for Disclosure Limitation of Establishment Tabular Data. Retrieved from <https://www.census.gov/prod/2/gen/96arc/iaevans.pdf>.
